# Supplementary material for: Measuring Predictability of Autonomous Network Transitions into Bursting Dynamics
Source: PLoS One. 2015 Apr 9;10(4):e0122225. doi: 10.1371/journal.pone.0122225 (PMC4391948; doi:10.1371/journal.pone.0122225)
Supplement: S3 Dataset — Excitatory only network, Pe = 0.4 neurons receive no noise, and their external current is taken from a uniform distribution of Ieext = 0.95–1.15. (XLS) [file pone.0122225.s003.xls]

## Sheet: Sheet1
193	155
194	95
194	145
195	47
195	50
195	86
195	133
196	53
197	2
197	3
197	44
197	57
197	92
197	191
198	9
198	34
198	43
198	52
198	54
198	55
198	63
198	79
198	85
198	89
198	93
198	148
198	156
198	172
198	200
199	4
199	7
199	8
199	20
199	46
199	48
199	51
199	56
199	58
199	60
199	64
199	70
199	75
199	77
199	90
199	108
199	121
199	142
199	143
199	149
199	151
199	159
199	177
199	194
199	199
200	1
200	5
200	6
200	10
200	26
200	30
200	32
200	39
200	45
200	49
200	59
200	68
200	69
200	74
200	76
200	78
200	83
200	84
200	87
200	97
200	105
200	109
200	111
200	115
200	122
200	132
200	138
200	139
200	147
200	153
200	158
200	160
200	171
200	174
200	175
200	195
200	196
200	198
201	11
201	14
201	19
201	22
201	24
201	31
201	35
201	36
201	37
201	41
201	42
201	61
201	65
201	66
201	67
201	72
201	80
201	81
201	82
201	88
201	94
201	96
201	98
201	100
201	123
201	124
201	125
201	126
201	129
201	130
201	134
201	136
201	137
201	141
201	150
201	152
201	157
201	162
201	164
201	168
201	178
201	179
201	181
201	184
201	186
201	187
201	189
201	190
201	192
202	13
202	17
202	21
202	23
202	27
202	29
202	33
202	38
202	62
202	71
202	73
202	91
202	106
202	107
202	110
202	112
202	113
202	114
202	116
202	117
202	119
202	128
202	131
202	135
202	140
202	144
202	146
202	154
202	161
202	163
202	165
202	167
202	170
202	176
202	180
202	185
202	188
202	193
203	12
203	18
203	25
203	28
203	40
203	99
203	101
203	102
203	103
203	104
203	118
203	166
203	173
203	183
203	197
204	15
204	16
204	120
204	127
204	169
204	182
365	95
368	133
370	155
371	92
372	93
373	3
374	9
375	47
375	70
376	50
376	74
376	77
376	96
377	7
377	26
377	30
377	64
377	89
377	97
377	122
377	145
377	175
377	194
377	200
378	1
378	4
378	6
378	8
378	10
378	20
378	22
378	66
378	68
378	76
378	98
378	121
378	137
378	159
379	5
379	44
379	59
379	72
379	78
379	90
379	94
379	100
379	139
379	142
379	151
379	172
379	191
379	195
380	2
380	11
380	24
380	31
380	34
380	43
380	48
380	53
380	55
380	65
380	67
380	69
380	75
380	86
380	136
380	143
380	174
380	177
380	179
380	190
380	196
380	199
381	13
381	19
381	23
381	25
381	27
381	29
381	39
381	46
381	52
381	57
381	60
381	63
381	73
381	79
381	91
381	124
381	125
381	126
381	134
381	141
381	148
381	149
381	153
381	156
381	160
381	161
381	162
381	171
381	176
381	198
382	12
382	14
382	21
382	28
382	32
382	45
382	49
382	51
382	56
382	58
382	62
382	71
382	87
382	88
382	99
382	105
382	108
382	111
382	118
382	119
382	123
382	135
382	138
382	140
382	147
382	152
382	158
382	163
382	164
382	168
382	186
382	188
382	192
382	193
383	17
383	33
383	35
383	38
383	41
383	54
383	61
383	80
383	81
383	84
383	85
383	101
383	115
383	116
383	128
383	129
383	130
383	131
383	132
383	150
383	154
383	165
383	167
383	178
383	180
383	181
383	184
383	187
383	189
383	197
384	15
384	16
384	18
384	36
384	37
384	42
384	82
384	83
384	102
384	103
384	106
384	109
384	114
384	117
384	120
384	144
384	146
384	157
384	166
384	183
384	185
385	104
385	107
385	110
385	113
385	127
385	169
385	170
385	173
386	40
386	112
386	182
387	95
390	133
468	93
472	92
500	155
509	47
518	44
523	43
526	86
526	145
527	46
528	41
528	191
529	151
530	45
530	89
531	108
532	42
532	49
532	70
532	90
532	142
532	172
533	50
533	111
533	148
533	153
534	39
534	48
534	87
534	121
534	143
534	156
534	192
535	2
535	26
535	30
535	35
535	79
535	85
535	91
535	94
535	95
535	149
535	195
536	61
536	84
536	147
536	152
536	164
536	174
536	175
536	189
536	194
536	199
537	3
537	8
537	32
537	53
537	55
537	64
537	88
537	122
537	168
537	196
538	9
538	10
538	34
538	40
538	47
538	51
538	52
538	63
538	66
538	68
538	69
538	82
538	83
538	92
538	109
538	112
538	115
538	123
538	126
538	146
538	154
538	157
538	159
538	171
538	198
539	4
539	7
539	14
539	20
539	22
539	29
539	31
539	33
539	36
539	37
539	57
539	59
539	67
539	74
539	75
539	78
539	80
539	93
539	96
539	98
539	105
539	106
539	107
539	124
539	125
539	133
539	139
539	141
539	150
539	158
539	160
539	176
539	177
539	193
539	200
540	1
540	6
540	12
540	19
540	24
540	27
540	28
540	38
540	56
540	58
540	60
540	62
540	65
540	72
540	73
540	77
540	81
540	97
540	104
540	129
540	130
540	138
540	144
540	163
540	167
540	179
540	186
540	187
540	188
540	190
541	5
541	13
541	25
541	54
541	76
541	100
541	110
541	114
541	116
541	118
541	119
541	132
541	134
541	135
541	136
541	137
541	140
541	161
541	165
541	184
542	11
542	21
542	23
542	71
542	101
542	113
542	117
542	127
542	128
542	162
542	170
542	178
542	180
542	181
542	185
543	15
543	17
543	18
543	102
543	103
543	120
543	131
543	166
543	173
543	183
544	16
544	99
544	169
544	197
545	44
545	182
548	155
549	145
553	43
582	86
622	191
642	108
651	90
655	111
658	89
658	92
661	26
662	45
662	87
663	41
664	47
665	44
665	93
666	95
666	142
667	30
667	46
667	91
667	122
668	61
669	49
669	70
669	85
669	86
669	88
669	172
670	22
670	39
670	43
670	94
671	29
671	59
671	64
671	151
671	164
672	42
672	50
672	153
672	199
673	24
673	25
673	28
673	32
673	35
673	48
673	84
673	121
673	126
673	143
673	174
674	53
674	55
674	57
674	60
674	63
674	83
674	156
674	168
674	175
675	27
675	33
675	34
675	52
675	58
675	65
675	66
675	68
675	74
675	82
675	123
675	124
675	125
675	133
675	145
675	148
675	152
675	163
675	198
676	8
676	31
676	37
676	51
676	56
676	67
676	69
676	78
676	98
676	107
676	171
676	192
676	194
677	23
677	40
677	62
677	72
677	79
677	80
677	96
677	97
677	104
677	129
677	141
677	147
677	157
677	176
677	195
677	200
678	3
678	4
678	20
678	36
678	38
678	54
678	75
678	81
678	112
678	115
678	138
678	140
678	149
678	150
678	160
678	165
678	177
678	179
678	190
678	193
678	196
679	2
679	10
679	14
679	19
679	21
679	73
679	76
679	77
679	90
679	100
679	106
679	114
679	116
679	118
679	119
679	130
679	134
679	135
679	139
679	144
679	154
679	167
679	170
679	180
679	189
680	1
680	6
680	7
680	9
680	105
680	127
680	128
680	132
680	136
680	137
680	146
680	158
680	159
680	161
680	178
680	186
680	187
680	188
681	12
681	18
681	71
681	101
681	109
681	110
681	113
681	117
681	120
681	155
681	162
681	166
681	181
681	183
681	184
682	5
682	11
682	13
682	17
682	102
682	103
682	131
682	173
682	191
683	99
683	169
683	185
684	15
684	16
684	87
684	108
684	197
685	142
685	182
686	26
686	111
687	92
689	89
691	122
692	30
692	44
693	47
696	164
700	41
714	95
716	93
766	45
771	61
777	59
780	57
783	58
783	60
784	55
784	63
784	64
785	56
788	54
790	39
790	62
791	65
792	69
792	133
793	66
793	67
793	70
793	200
794	68
795	199
796	51
796	175
797	86
797	156
797	172
798	3
798	8
798	43
798	47
798	72
798	171
799	74
799	163
800	50
800	88
800	174
801	32
801	48
801	49
801	53
801	73
801	90
801	136
801	145
801	198
802	1
802	78
802	84
802	85
802	87
802	134
802	168
803	4
803	30
803	44
803	46
803	75
803	76
803	80
803	98
803	165
804	7
804	14
804	29
804	41
804	77
804	89
804	92
804	138
804	141
804	151
804	167
804	177
805	6
805	11
805	31
805	71
805	82
805	91
805	94
805	137
805	142
805	150
805	153
805	176
805	179
805	191
805	194
806	2
806	10
806	33
806	34
806	35
806	37
806	42
806	79
806	83
806	122
806	126
806	129
806	139
806	143
806	149
806	157
806	170
807	5
807	19
807	26
807	27
807	52
807	100
807	108
807	115
807	121
807	124
807	125
807	130
807	132
807	135
807	152
807	159
807	160
807	162
807	166
807	190
807	193
807	195
807	196
808	22
808	38
808	40
808	45
808	81
808	95
808	128
808	140
808	146
808	148
808	154
808	161
808	164
808	178
808	186
808	192
809	9
809	12
809	13
809	20
809	24
809	28
809	36
809	93
809	96
809	97
809	101
809	105
809	111
809	117
809	123
809	131
809	147
809	158
809	173
809	180
809	181
809	188
809	189
810	15
810	23
810	25
810	104
810	116
810	118
810	144
810	169
810	183
810	187
811	17
811	21
811	99
811	106
811	107
811	119
811	120
811	155
811	184
811	197
812	16
812	18
812	55
812	59
812	61
812	102
812	103
812	114
812	127
812	185
813	109
813	112
813	113
814	39
814	110
814	182
815	57
815	64
816	62
816	63
816	133
818	8
820	60
820	66
820	175
820	200
821	56
821	58
822	70
823	67
825	68
827	171
830	69
852	156
877	65
880	199
886	3
894	1
900	4
904	7
907	6
907	54
908	5
908	50
908	172
909	51
910	8
910	47
910	174
911	11
911	198
912	48
913	72
913	195
914	2
914	10
914	53
915	14
916	43
916	145
916	194
917	55
917	177
917	191
918	49
918	141
919	19
919	176
919	186
919	193
919	196
920	13
920	32
920	76
920	168
920	171
920	190
921	45
921	46
921	52
921	75
921	151
921	153
921	192
922	12
922	74
922	90
923	9
923	15
923	41
923	42
923	44
923	69
923	70
923	78
923	79
923	88
923	105
923	137
923	142
923	167
923	187
923	189
924	20
924	30
924	56
924	68
924	71
924	73
924	80
924	86
924	125
924	143
924	175
925	67
925	77
925	83
925	87
925	121
925	136
925	139
925	148
925	149
925	163
925	179
925	188
926	58
926	92
926	98
926	111
926	132
926	134
926	146
926	150
926	164
926	165
926	180
926	184
926	200
927	16
927	29
927	35
927	39
927	57
927	59
927	61
927	89
927	108
927	129
927	130
927	131
927	138
927	170
927	178
927	199
928	17
928	24
928	31
928	33
928	62
928	63
928	64
928	84
928	85
928	94
928	101
928	122
928	126
928	133
928	135
928	147
928	166
928	181
928	185
929	26
929	27
929	34
929	36
929	37
929	38
929	40
929	60
929	81
929	82
929	93
929	95
929	100
929	116
929	123
929	124
929	128
929	144
929	152
929	183
930	3
930	18
930	21
930	23
930	66
930	91
930	106
930	107
930	112
930	115
930	117
930	119
930	140
930	154
930	156
930	157
930	158
930	162
930	169
931	22
931	28
931	96
931	97
931	118
931	120
931	159
931	173
932	1
932	103
932	104
932	110
932	114
932	160
932	161
932	182
933	8
933	99
933	102
933	113
933	197
934	25
934	109
934	127
934	155
935	7
935	174
936	53
936	65
937	4
937	6
937	47
938	172
939	55
941	198
943	177
944	51
944	195
945	5
946	171
948	19
949	2
949	48
950	50
951	72
953	194
957	145
961	193
968	190
998	54
998	186
1000	14
1000	52
1002	11
1003	49
1004	10
1007	141
1009	13
1009	56
1011	32
1016	15
1016	142
1018	90
1020	58
1021	12
1021	189
1022	143
1023	46
1023	111
1025	59
1025	191
1026	8
1026	45
1026	55
1027	43
1027	153
1027	187
1028	9
1028	44
1028	51
1028	86
1028	87
1029	7
1029	47
1029	60
1029	151
1029	188
1029	192
1030	48
1030	57
1030	121
1030	195
1030	196
1031	35
1031	63
1031	69
1031	88
1032	6
1032	41
1032	42
1032	70
1032	79
1032	89
1032	92
1032	138
1032	184
1033	19
1033	30
1033	125
1033	164
1033	185
1034	64
1034	67
1034	122
1034	133
1034	139
1034	156
1034	190
1035	3
1035	16
1035	39
1035	53
1035	61
1035	62
1035	85
1035	105
1035	112
1035	126
1035	132
1035	148
1035	168
1035	194
1035	200
1036	4
1036	20
1036	33
1036	36
1036	49
1036	50
1036	68
1036	83
1036	129
1036	135
1036	136
1036	137
1036	147
1036	167
1036	176
1036	199
1037	26
1037	29
1037	71
1037	91
1037	108
1037	124
1037	150
1037	163
1037	175
1037	198
1038	1
1038	37
1038	84
1038	93
1038	94
1038	107
1038	115
1038	123
1038	131
1038	134
1038	145
1038	146
1038	171
1039	31
1039	32
1039	38
1039	66
1039	72
1039	75
1039	76
1039	80
1039	95
1039	119
1039	140
1039	144
1039	149
1039	152
1039	165
1039	170
1039	174
1039	180
1039	193
1040	5
1040	18
1040	24
1040	28
1040	34
1040	40
1040	65
1040	73
1040	74
1040	77
1040	78
1040	98
1040	106
1040	110
1040	128
1040	130
1040	141
1040	157
1040	166
1040	172
1040	177
1040	178
1040	179
1040	182
1041	2
1041	14
1041	17
1041	21
1041	23
1041	27
1041	81
1041	82
1041	90
1041	96
1041	101
1041	104
1041	116
1041	117
1041	118
1041	154
1041	158
1041	181
1042	22
1042	56
1042	100
1042	114
1042	120
1042	142
1042	159
1042	160
1042	169
1042	173
1042	186
1043	52
1043	97
1043	113
1043	143
1043	161
1043	162
1043	183
1043	197
1044	25
1044	102
1044	103
1045	109
1045	127
1045	155
1046	99
1047	10
1048	54
1049	8
1049	13
1049	55
1049	111
1049	189
1050	11
1051	59
1053	58
1055	12
1056	51
1057	15
1057	87
1060	9
1063	7
1069	6
1069	121
1074	195
1080	19
1141	191
1143	153
1144	151
1147	187
1149	86
1149	164
1150	69
1151	48
1151	57
1152	148
1152	156
1152	188
1153	46
1153	185
1153	190
1154	44
1154	184
1154	189
1155	45
1155	47
1155	49
1155	60
1155	70
1155	88
1155	192
1155	200
1156	92
1156	194
1157	32
1157	43
1157	63
1157	85
1157	89
1157	133
1157	196
1158	50
1158	56
1158	61
1158	147
1159	3
1159	35
1159	42
1159	53
1159	58
1159	67
1159	90
1159	138
1159	145
1159	157
1159	198
1160	20
1160	41
1160	52
1160	55
1160	59
1160	64
1160	72
1160	79
1160	87
1160	112
1160	122
1160	132
1160	152
1160	171
1160	186
1160	195
1161	39
1161	54
1161	62
1161	94
1161	108
1161	125
1161	143
1161	154
1161	158
1161	163
1162	8
1162	14
1162	30
1162	36
1162	84
1162	93
1162	123
1162	150
1162	168
1162	175
1162	182
1162	199
1163	1
1163	26
1163	29
1163	33
1163	51
1163	66
1163	68
1163	73
1163	75
1163	83
1163	91
1163	115
1163	124
1163	126
1163	129
1163	137
1163	139
1163	142
1163	149
1163	159
1163	160
1163	165
1163	167
1163	193
1164	2
1164	4
1164	7
1164	31
1164	65
1164	82
1164	95
1164	105
1164	106
1164	111
1164	134
1164	135
1164	136
1164	141
1164	146
1164	161
1164	166
1164	172
1165	5
1165	37
1165	71
1165	77
1165	80
1165	81
1165	104
1165	107
1165	110
1165	119
1165	131
1165	170
1165	174
1165	177
1166	6
1166	11
1166	13
1166	19
1166	24
1166	34
1166	38
1166	74
1166	76
1166	78
1166	96
1166	98
1166	116
1166	118
1166	128
1166	130
1166	155
1166	162
1166	176
1166	178
1166	179
1166	180
1166	197
1167	17
1167	21
1167	22
1167	23
1167	28
1167	40
1167	100
1167	101
1167	113
1167	114
1167	117
1167	120
1167	121
1167	140
1167	144
1167	151
1167	181
1168	10
1168	12
1168	16
1168	27
1168	97
1168	109
1168	169
1169	9
1169	15
1169	18
1169	25
1169	102
1169	103
1169	127
1169	173
1169	183
1169	191
1170	164
1171	99
1172	153
1175	48
1175	148
1191	69
1231	86
1237	156
1256	185
1261	57
1263	44
1265	188
1267	189
1269	46
1269	70
1269	184
1269	190
1270	47
1272	43
1272	187
1274	49
1274	191
1275	45
1276	50
1276	58
1276	108
1276	186
1277	145
1277	192
1277	195
1277	200
1278	41
1278	42
1278	133
1278	182
1278	194
1279	53
1279	61
1280	52
1280	55
1280	56
1280	60
1280	92
1281	32
1281	35
1281	48
1281	54
1281	59
1281	111
1281	171
1281	196
1282	51
1282	90
1282	152
1282	153
1283	63
1283	64
1283	87
1283	112
1283	151
1283	198
1284	3
1284	7
1284	67
1284	73
1284	79
1284	106
1284	175
1284	199
1285	20
1285	36
1285	39
1285	62
1285	72
1285	89
1285	107
1285	122
1285	132
1285	158
1286	19
1286	71
1286	93
1286	110
1286	115
1286	143
1286	157
1286	167
1286	172
1286	174
1286	180
1286	193
1287	1
1287	14
1287	37
1287	40
1287	65
1287	66
1287	68
1287	69
1287	88
1287	91
1287	95
1287	136
1287	137
1287	147
1287	148
1287	149
1287	177
1288	8
1288	26
1288	30
1288	33
1288	57
1288	77
1288	85
1288	94
1288	104
1288	129
1288	134
1288	142
1288	150
1288	154
1288	156
1288	163
1288	164
1288	168
1288	178
1289	2
1289	4
1289	5
1289	38
1289	74
1289	75
1289	83
1289	86
1289	96
1289	105
1289	114
1289	125
1289	130
1289	138
1289	139
1289	146
1289	176
1289	179
1289	181
1290	6
1290	11
1290	24
1290	29
1290	31
1290	76
1290	78
1290	80
1290	81
1290	84
1290	98
1290	113
1290	117
1290	123
1290	124
1290	126
1290	131
1290	135
1290	141
1290	160
1290	165
1290	166
1290	170
1290	197
1291	22
1291	34
1291	97
1291	101
1291	116
1291	118
1291	121
1291	128
1291	140
1291	155
1291	159
1291	162
1291	183
1292	10
1292	12
1292	13
1292	17
1292	21
1292	23
1292	28
1292	44
1292	82
1292	100
1292	109
1292	120
1292	144
1292	161
1293	9
1293	15
1293	27
1293	70
1293	102
1293	103
1293	119
1293	173
1294	16
1294	18
1294	25
1294	169
1295	99
1295	127
1296	185
1296	190
1298	47
1299	186
1301	184
1302	189
1303	145
1304	108
1304	188
1310	191
1311	43
1313	195
1319	192
1370	200
1376	171
1395	196
1396	194
1397	55
1398	187
1401	198
1402	133
1402	190
1403	20
1404	167
1405	19
1405	58
1407	51
1407	56
1407	189
1408	3
1408	49
1408	52
1408	199
1409	46
1409	195
1410	1
1410	32
1410	45
1410	54
1410	111
1411	50
1411	59
1411	137
1411	186
1412	17
1412	47
1412	48
1412	87
1412	90
1412	149
1412	165
1412	182
1412	191
1413	21
1413	42
1413	53
1413	106
1413	153
1413	188
1414	4
1414	7
1414	23
1414	35
1414	41
1414	57
1414	60
1414	71
1414	92
1414	107
1414	112
1414	122
1414	136
1414	151
1414	172
1414	185
1414	193
1415	44
1415	61
1415	64
1415	70
[truncated: 54,637 more rows]
