# Supplementary material for: Measuring Predictability of Autonomous Network Transitions into Bursting Dynamics
Source: PLoS One. 2015 Apr 9;10(4):e0122225. doi: 10.1371/journal.pone.0122225 (PMC4391948; doi:10.1371/journal.pone.0122225)
Supplement: S10 Dataset — Excitatory neurons in the excitatory-inhibitory network, where Pe = 0.15 and Pi = 0, neurons receive no noise, and their external current is taken from a uniform distribution of Iiext = 0.9–1, Ieext = 0.95–1.15. (XLS) [file pone.0122225.s010.xls]

## Sheet: Sheet1
190	160
192	163
193	53
193	161
194	159
194	164
195	156
195	157
195	162
196	14
196	52
196	134
196	158
196	165
196	167
197	11
197	37
197	135
197	154
197	166
197	169
198	4
198	8
198	13
198	18
198	40
198	51
198	54
198	55
198	57
198	70
198	138
198	151
198	168
199	10
199	12
199	26
199	38
199	49
199	50
199	56
199	58
199	88
199	131
199	137
199	139
199	170
200	5
200	9
200	16
200	17
200	22
200	39
200	42
200	43
200	47
200	48
200	60
200	61
200	66
200	97
200	100
200	130
200	136
200	141
200	155
200	171
200	188
201	3
201	6
201	15
201	20
201	21
201	27
201	28
201	34
201	41
201	59
201	63
201	64
201	68
201	69
201	72
201	73
201	81
201	126
201	127
201	128
201	132
201	140
201	147
201	152
201	153
201	173
201	174
201	176
201	190
201	191
201	195
202	1
202	19
202	23
202	24
202	30
202	36
202	44
202	45
202	46
202	62
202	67
202	71
202	74
202	76
202	96
202	102
202	104
202	107
202	124
202	133
202	142
202	149
202	150
202	175
202	177
202	192
202	193
202	194
202	198
202	199
203	2
203	7
203	25
203	31
203	32
203	33
203	35
203	65
203	75
203	77
203	78
203	84
203	87
203	93
203	99
203	101
203	103
203	105
203	109
203	110
203	111
203	122
203	123
203	129
203	143
203	145
203	146
203	148
203	172
203	178
203	186
203	189
203	196
203	197
204	29
204	79
204	80
204	82
204	83
204	86
204	89
204	92
204	98
204	106
204	108
204	114
204	117
204	120
204	125
204	144
204	179
204	182
204	184
204	187
204	200
205	85
205	90
205	91
205	94
205	95
205	116
205	119
205	121
205	185
206	112
206	113
206	115
206	118
206	181
207	183
350	160
356	163
357	161
358	157
358	159
358	164
359	156
359	162
360	158
362	154
362	165
362	167
363	134
363	166
363	169
364	37
365	4
365	26
365	168
366	88
367	22
367	151
367	155
367	170
368	135
368	137
368	171
368	188
369	40
370	8
370	14
370	23
370	38
370	97
370	100
370	131
370	138
370	150
370	173
371	11
371	18
371	39
371	127
371	130
371	136
371	139
371	174
371	176
372	10
372	20
372	21
372	24
372	27
372	30
372	34
372	41
372	78
372	126
372	132
372	141
372	147
372	177
373	5
373	6
373	12
373	13
373	16
373	17
373	19
373	28
373	36
373	42
373	43
373	93
373	111
373	133
373	140
373	172
373	175
373	195
374	9
374	25
374	60
374	102
374	117
374	128
374	148
374	190
374	191
375	15
375	33
375	44
375	64
375	84
375	87
375	89
375	96
375	101
375	103
375	110
375	124
375	129
375	142
375	143
375	145
375	146
375	149
375	152
375	178
375	192
375	194
376	2
376	31
376	32
376	35
376	79
376	91
376	92
376	99
376	104
376	107
376	109
376	122
376	123
376	144
376	193
376	198
377	53
377	54
377	58
377	61
377	62
377	69
377	77
377	81
377	86
377	90
377	94
377	95
377	98
377	105
377	106
377	108
377	114
377	120
377	125
377	179
377	182
377	187
377	189
377	196
377	197
377	199
378	1
378	3
378	29
378	46
378	47
378	52
378	56
378	63
378	66
378	67
378	71
378	75
378	80
378	82
378	83
378	112
378	113
378	115
378	116
378	119
378	121
378	153
378	180
379	45
379	51
379	57
379	59
379	65
379	73
379	76
379	85
379	118
379	186
379	200
380	7
380	50
380	55
380	68
380	70
380	72
380	181
381	49
381	74
381	184
382	48
382	183
382	185
458	160
461	157
463	159
465	161
468	163
468	164
470	4
470	162
476	165
477	134
478	37
480	166
481	167
483	168
483	169
488	170
489	188
490	171
494	173
496	20
496	174
498	176
499	172
499	175
499	177
502	178
504	22
505	18
505	26
506	21
506	38
506	97
506	179
507	19
508	16
508	24
509	17
509	23
510	182
510	195
511	14
511	40
511	100
512	11
512	25
512	28
512	30
512	137
512	191
512	192
513	8
513	27
513	39
513	78
514	15
514	102
514	135
514	181
515	12
515	34
515	42
515	101
515	110
516	5
516	13
516	41
516	43
516	139
516	194
516	197
517	36
517	79
517	99
517	136
517	138
517	190
517	193
517	198
518	9
518	10
518	31
518	32
518	35
518	98
518	106
518	109
518	131
518	140
518	141
518	196
518	199
519	33
519	44
519	64
519	96
519	107
519	144
520	29
520	47
520	104
520	105
520	158
521	1
521	60
521	77
521	82
521	103
521	108
521	126
521	142
521	145
521	200
522	2
522	3
522	6
522	37
522	45
522	61
522	67
522	75
522	92
522	143
522	189
523	53
523	66
523	80
523	111
523	127
523	155
524	46
524	58
524	62
524	63
524	65
524	71
524	76
524	84
524	94
524	112
524	113
524	114
524	120
524	128
524	146
525	51
525	52
525	56
525	57
525	59
525	69
525	81
525	83
525	86
525	88
525	116
525	117
525	147
525	148
525	156
526	90
526	95
526	122
526	124
526	130
526	151
526	154
526	157
526	186
527	55
527	68
527	73
527	85
527	87
527	115
527	119
527	123
527	150
527	159
527	160
527	187
528	4
528	48
528	49
528	50
528	54
528	72
528	74
528	89
528	93
528	125
528	129
528	149
529	7
529	70
529	91
529	118
529	121
529	152
529	153
530	184
530	185
532	183
533	133
534	132
534	188
536	164
540	134
544	161
548	163
551	162
556	166
559	165
561	167
562	169
563	168
612	97
621	100
664	135
667	131
667	137
668	136
669	138
670	139
671	141
672	22
672	140
673	26
673	134
674	133
674	142
674	160
675	18
675	126
676	20
676	23
676	38
676	128
676	130
676	143
677	17
677	21
677	24
677	37
677	127
677	164
677	191
678	14
678	16
678	19
678	30
678	132
678	145
678	195
679	1
679	25
679	27
679	28
679	40
679	124
679	129
679	144
679	146
679	194
680	11
680	34
680	39
680	125
680	159
680	193
681	10
681	13
681	15
681	31
681	32
681	42
681	43
681	78
681	110
681	122
681	123
681	147
681	157
681	161
681	163
681	192
681	197
681	198
682	8
682	12
682	33
682	35
682	36
682	41
682	46
682	158
682	190
682	196
683	5
683	9
683	29
683	120
683	156
683	162
683	182
683	199
683	200
684	3
684	4
684	44
684	77
684	81
684	109
684	117
684	121
684	188
685	2
685	64
685	71
685	82
685	108
685	119
685	148
685	165
685	189
686	45
686	62
686	67
686	69
686	80
686	107
686	118
686	154
686	186
687	6
687	60
687	66
687	73
687	75
687	79
687	84
687	86
687	106
687	116
687	150
687	151
687	155
687	169
687	187
688	58
688	63
688	70
688	76
688	83
688	102
688	113
688	114
688	115
688	149
688	166
689	56
689	59
689	61
689	65
689	68
689	72
689	74
689	85
689	88
689	103
689	105
689	111
689	112
689	153
689	167
689	168
689	184
689	185
690	53
690	87
690	170
690	172
691	57
691	99
691	101
691	104
691	152
691	171
691	176
692	54
692	92
692	173
693	55
693	90
693	93
693	96
693	174
694	89
694	175
695	52
695	98
695	177
696	51
696	91
697	50
697	94
697	95
698	7
698	47
698	97
698	100
698	181
699	48
699	49
701	178
701	179
702	183
708	180
715	182
828	11
833	8
834	10
835	12
835	13
836	9
836	14
838	157
839	5
840	4
840	6
840	135
841	27
841	159
842	17
842	128
842	138
842	139
843	18
843	37
843	131
843	134
843	137
843	160
844	2
844	3
844	22
844	58
844	60
844	64
844	126
844	136
844	140
844	141
844	161
844	196
845	1
845	26
845	38
845	130
845	158
845	163
845	184
846	20
846	21
846	39
846	107
846	132
846	142
846	154
846	176
846	195
846	199
847	23
847	24
847	31
847	40
847	61
847	81
847	88
847	124
847	127
847	133
847	143
847	145
847	156
847	162
847	164
847	186
847	192
847	194
847	197
847	198
848	34
848	62
848	63
848	110
848	125
848	129
848	155
848	193
848	200
849	16
849	30
849	35
849	36
849	41
849	42
849	46
849	53
849	59
849	69
849	77
849	84
849	122
849	123
849	144
849	146
849	185
849	188
849	190
849	191
850	19
850	28
850	29
850	33
850	43
850	44
850	56
850	57
850	65
850	66
850	78
850	102
850	104
850	108
850	120
850	148
850	165
850	187
851	15
851	25
851	32
851	54
851	55
851	67
851	68
851	71
851	80
851	82
851	86
851	105
851	106
851	109
851	111
851	121
851	147
851	151
851	167
851	189
852	45
852	73
852	83
852	85
852	87
852	103
852	117
852	119
852	150
852	166
852	169
853	51
853	52
853	70
853	72
853	75
853	79
853	114
853	118
853	152
854	74
854	76
854	100
854	101
854	112
854	113
854	115
854	116
854	149
854	168
854	172
855	50
855	89
855	92
855	173
856	49
856	90
856	99
856	153
856	174
857	47
857	48
857	97
857	170
858	91
858	96
858	171
858	175
859	93
859	98
860	177
861	94
862	7
863	95
869	178
872	182
875	181
876	179
879	183
881	11
888	180
948	184
957	185
958	186
962	187
962	188
966	189
967	8
969	10
969	20
969	191
969	192
970	9
970	12
970	190
971	13
971	14
974	5
974	11
974	157
974	193
975	4
975	6
975	17
975	18
975	27
975	194
976	195
977	159
977	196
977	197
978	15
978	16
978	21
978	22
979	26
979	176
980	19
980	24
980	64
980	77
980	155
980	198
981	2
981	60
982	1
982	23
982	38
982	84
982	102
982	161
983	3
983	28
983	37
983	58
983	110
983	158
983	199
984	31
984	39
984	78
984	160
984	200
985	25
985	30
985	61
985	88
986	32
986	34
986	35
986	40
986	63
986	80
986	81
986	156
986	163
987	36
987	62
987	103
987	162
987	172
988	29
988	33
988	42
988	43
988	56
988	59
988	82
988	144
988	154
989	41
989	53
989	57
989	65
989	67
989	76
989	107
989	120
989	135
989	164
989	175
990	44
990	83
990	104
990	106
990	109
990	134
991	54
991	55
991	66
991	79
991	85
991	87
991	99
991	101
991	105
991	114
991	137
991	139
991	140
991	174
992	75
992	92
992	100
992	108
992	117
992	131
992	138
992	141
992	145
992	151
992	167
992	173
993	51
993	52
993	111
993	113
993	119
993	165
994	69
994	73
994	86
994	112
994	116
994	142
994	143
994	168
994	169
995	118
995	126
995	136
995	146
995	147
995	148
995	177
996	46
996	90
996	115
996	121
996	122
996	150
996	152
996	166
996	170
996	171
997	50
997	89
997	97
997	127
997	178
998	71
998	72
998	74
998	91
998	96
998	98
998	123
999	49
999	130
999	149
999	182
1000	94
1000	124
1000	153
1001	47
1001	70
1001	93
1001	125
1001	128
1002	48
1003	45
1003	129
1003	133
1004	179
1004	181
1004	186
1005	7
1005	95
1006	132
1008	183
1012	184
1021	185
1076	11
1080	157
1082	8
1082	9
1082	10
1084	68
1085	12
1085	13
1086	159
1088	14
1090	4
1090	5
1091	27
1092	6
1093	64
1093	161
1097	60
1098	2
1099	176
1100	160
1100	163
1101	26
1101	61
1101	66
1101	134
1102	58
1102	62
1102	102
1103	63
1103	65
1104	67
1104	162
1104	194
1105	37
1105	59
1105	158
1106	69
1106	164
1106	188
1107	38
1107	39
1108	22
1108	191
1108	192
1108	196
1109	24
1109	56
1109	57
1109	190
1109	197
1109	198
1110	23
1110	53
1110	135
1110	187
1110	193
1110	195
1111	20
1111	34
1111	40
1111	55
1111	71
1111	189
1111	199
1112	35
1112	42
1112	54
1112	77
1112	103
1113	21
1113	36
1113	41
1113	110
1113	137
1113	165
1114	3
1114	18
1114	43
1114	52
1114	155
1115	17
1115	44
1115	51
1115	78
1115	156
1116	30
1116	32
1116	73
1116	131
1116	139
1117	19
1117	31
1117	33
1117	72
1117	136
1117	172
1117	200
1118	28
1118	50
1118	75
1118	138
1118	186
1119	15
1119	16
1119	25
1119	74
1119	99
1119	106
1119	114
1119	126
1119	154
1119	167
1120	1
1120	70
1120	76
1120	104
1120	120
1120	140
1120	141
1120	168
1120	175
1121	49
1121	105
1121	109
1121	169
1122	29
1122	81
1122	100
1122	101
1122	166
1123	46
1123	97
1123	107
1123	108
1123	117
1123	127
1123	144
1123	173
1123	174
1124	113
1124	142
1125	112
1125	116
1125	119
1125	130
1125	143
1125	170
1125	171
1125	177
1126	48
1126	96
1126	111
1126	118
1126	122
1126	123
1126	145
1126	178
1127	84
1127	98
1127	115
1127	159
1127	182
1128	47
1128	124
1128	129
1128	146
1128	184
1129	86
1129	121
1129	128
1129	179
1130	45
1130	83
1130	88
1130	125
1131	79
1131	82
1131	87
1131	147
1131	157
1132	80
1132	85
1132	148
1132	181
1132	185
1133	27
1133	92
1133	151
1134	150
1135	7
1135	94
1136	90
1136	149
1136	152
1136	183
1137	11
1137	89
1138	4
1138	14
1138	102
1139	91
1139	153
1140	93
1144	180
1145	9
1145	133
1146	5
1146	8
1147	132
1148	176
1149	12
1151	10
1152	13
1153	6
1160	2
1167	26
1188	134
1205	160
1211	161
1211	163
1213	164
1214	162
1215	158
1216	159
1220	37
1221	156
1221	165
1222	157
1223	154
1223	188
1226	38
1226	155
1227	137
1228	167
1229	22
1229	41
1229	135
1230	40
1230	169
1230	192
1231	34
1231	78
1231	131
1231	136
1231	166
1232	42
1232	103
1232	187
1232	190
1232	191
1233	39
1233	138
1233	139
1233	168
1233	194
1234	36
1234	43
1234	44
1234	186
1234	195
1235	140
1235	141
1235	189
1235	198
1236	35
1236	104
1236	197
1237	69
1237	100
1237	193
1237	196
1238	3
1238	20
1238	21
1238	23
1238	26
1238	30
1238	66
1238	170
1238	199
1239	24
1239	32
1239	64
1239	67
1239	105
1240	18
1240	33
1240	77
1240	101
1240	106
1240	142
1241	1
1241	4
1241	17
1241	19
1241	68
1241	71
1241	75
1241	102
1241	110
1242	65
1242	97
1242	99
1242	143
1242	200
1243	31
1243	61
1243	63
1243	73
1243	107
1243	109
1244	15
1244	16
1244	25
1244	28
1244	60
1244	62
1244	70
1244	72
1244	95
1244	108
1244	144
1245	27
1245	59
1245	74
1245	98
1245	126
1246	14
1246	53
1246	58
1246	96
1246	145
1247	29
1247	57
1248	56
1248	76
1248	146
1249	2
1249	5
1249	11
1249	114
1249	120
1249	127
1250	54
1250	55
1250	112
1250	130
1250	182
1251	51
1251	92
1251	94
1251	111
1251	113
1251	117
1251	147
1252	6
1252	52
1252	184
1253	12
1253	13
1253	123
1253	129
1254	116
1254	124
1254	185
1255	9
1255	10
1255	115
1255	119
1255	128
1255	148
1256	7
1256	8
1256	50
1256	118
1256	122
1256	125
1257	93
1257	150
1257	151
1258	90
1258	121
1259	152
1260	91
1260	149
1262	153
1263	86
1263	89
1263	160
1264	87
1265	157
1266	88
1266	164
1268	84
1268	159
1271	83
1272	85
1272	161
1272	163
1274	81
1274	82
1275	162
1276	134
1276	186
1278	80
1279	37
1279	79
1282	188
1284	132
1287	133
1289	131
1293	135
1302	22
1321	174
1324	175
1325	173
1326	171
1326	172
1326	176
1326	177
1327	178
1327	179
1328	47
1329	181
1330	78
1330	183
1332	48
1332	49
1332	182
1333	45
1333	46
1333	170
1334	38
1335	180
1335	192
1336	167
1337	44
1337	184
1338	41
1338	185
1338	187
1339	42
1339	137
1339	166
1340	40
1340	43
1340	75
1340	165
1340	168
1340	169
1342	26
1342	34
1342	39
1342	195
1343	20
1343	194
1344	71
1344	136
1345	69
1345	164
1346	21
1346	66
1346	77
1346	138
1346	139
1346	191
1346	196
1346	197
1347	140
1347	141
1347	198
1348	36
1348	73
1349	24
1349	72
1349	102
1349	193
1349	199
1350	3
1350	18
1350	23
1350	30
1350	37
1351	4
1351	19
1351	35
1351	74
1352	51
1352	67
1352	70
1352	143
1352	189
1353	1
1353	17
1353	65
1353	142
1354	32
1354	33
1354	190
1355	16
1355	64
1355	76
1355	103
1355	144
1355	200
1356	22
1356	63
1357	2
1357	14
1357	15
1357	68
1357	97
1357	100
1357	186
1357	188
1358	5
1358	25
1358	28
1358	61
1358	99
1358	126
1358	145
1359	11
1359	31
1359	62
1359	146
1360	27
1360	59
1360	60
1360	101
1360	109
1361	104
1361	105
1361	106
1361	147
1362	110
1362	127
1363	12
1363	13
1363	29
1363	107
1363	148
1364	53
1364	58
1364	96
1364	108
1364	130
1364	135
1365	6
1365	9
1365	98
1365	124
1365	129
1366	56
1366	150
1367	57
1367	134
1368	55
1369	8
1369	52
1369	112
1369	114
1369	160
1370	10
1370	50
1370	123
1370	128
1370	131
1371	54
1371	111
1371	125
1372	7
1372	113
1372	120
1372	158
1373	92
1374	122
1375	117
1375	163
1376	115
1376	116
1376	157
1377	119
1377	156
1377	159
1378	86
1378	118
1378	121
1378	154
1378	161
1378	162
1379	94
1379	149
1379	155
1381	151
1382	90
1382	93
1384	95
1384	152
1385	153
1386	89
1387	164
1388	88
1388	91
1389	87
1391	84
1396	83
1397	85
1398	81
1400	82
1404	79
1405	78
1405	80
1426	192
1428	26
1516	11
1523	8
1523	13
1523	102
1524	4
1524	10
1524	12
1525	9
1525	14
1525	38
1526	37
1526	39
1526	77
1526	176
1527	5
1527	40
1527	41
1527	137
1528	6
1528	27
1528	34
1528	42
1528	43
1528	133
1528	138
1528	139
1528	157
1528	195
1529	3
1529	35
1529	36
1529	47
1529	60
1529	76
1529	103
1529	105
1529	126
1529	140
1529	141
1529	174
1529	175
1529	194
1529	196
1529	197
1530	1
1530	44
1530	58
1530	64
1530	73
1530	75
1530	99
1530	104
1530	135
1530	136
1530	160
1530	173
1530	184
1530	191
1530	198
1531	2
1531	17
1531	33
1531	45
1531	46
1531	74
1531	100
1531	101
1531	106
1531	107
1531	128
1531	132
1531	134
1531	142
1531	159
1531	172
1531	177
1531	178
1531	186
1531	193
1531	199
1532	21
1532	22
1532	31
1532	32
1532	48
1532	61
1532	66
1532	72
1532	98
1532	108
1532	109
1532	110
1532	127
1532	130
1532	131
1532	143
1532	145
1532	179
1532	182
1532	190
1532	200
1533	18
1533	24
1533	30
1533	49
1533	53
1533	62
1533	63
1533	71
1533	97
1533	120
1533	124
1533	129
1533	144
1533	148
1533	161
1533	185
1533	187
1533	188
1534	7
1534	20
1534	23
1534	29
1534	51
1534	57
1534	59
1534	65
1534	69
1534	70
1534	122
1534	123
1534	125
1534	146
1534	147
1534	158
1534	163
1534	165
1534	171
1534	181
1534	189
1534	192
1535	26
1535	28
1535	52
1535	56
1535	67
1535	68
1535	81
1535	96
1535	111
1535	119
1535	164
1535	166
1535	168
1535	169
1535	170
1535	183
1536	15
1536	25
1536	50
1536	54
1536	55
1536	78
1536	86
1536	92
1536	112
[truncated: 43,418 more rows]
