# Supplementary material for: Measuring Predictability of Autonomous Network Transitions into Bursting Dynamics
Source: PLoS One. 2015 Apr 9;10(4):e0122225. doi: 10.1371/journal.pone.0122225 (PMC4391948; doi:10.1371/journal.pone.0122225)
Supplement: S12 Dataset — Excitatory neurons in the excitatory-inhibitory network, where Pe = 0.15 and Pi = 1, neurons receive no noise, and their external current is taken from a uniform distribution of Iiext = 0.9–1, Ieext = 0.95–1.15. (XLS) [file pone.0122225.s012.xls]

## Sheet: Sheet1
192	23
193	22
194	118
194	133
194	186
195	20
195	26
196	19
196	21
196	24
196	25
196	136
197	28
197	120
197	132
197	185
197	187
197	190
198	17
198	27
198	31
198	117
198	121
198	128
198	129
198	130
198	134
198	135
198	137
198	146
198	184
199	16
199	18
199	29
199	32
199	114
199	116
199	119
199	122
199	125
199	127
199	131
199	138
199	142
199	144
199	165
199	188
199	189
200	30
200	34
200	40
200	55
200	113
200	115
200	123
200	124
200	126
200	139
200	140
200	143
200	147
200	168
200	182
200	183
201	15
201	33
201	81
201	88
201	111
201	141
201	145
201	180
201	191
201	192
201	193
202	35
202	37
202	84
202	85
202	112
202	169
202	181
202	196
202	198
203	36
203	101
203	110
203	148
203	151
203	161
203	171
203	179
204	38
204	39
204	109
204	149
204	167
204	176
204	178
205	13
205	42
205	61
205	87
205	170
205	175
205	195
206	14
206	79
206	82
206	86
206	164
206	166
206	194
207	80
207	83
207	108
207	150
207	163
207	174
207	177
208	41
208	45
208	59
208	90
208	107
208	152
208	173
208	197
208	200
209	43
209	159
209	160
209	199
210	78
210	155
210	156
211	60
211	77
211	162
211	172
212	1
212	12
212	44
212	66
213	11
213	57
213	89
213	157
213	158
214	94
214	153
215	3
215	154
216	2
216	93
216	105
217	4
217	46
217	52
217	62
217	91
217	92
218	10
218	58
218	64
218	75
218	97
219	63
219	65
219	76
219	95
219	106
220	56
221	9
221	53
221	73
221	102
221	104
222	7
222	8
222	54
222	67
222	96
222	100
223	5
223	70
223	71
223	103
224	6
224	68
224	69
224	99
225	51
225	72
225	98
227	74
228	55
233	48
234	47
241	49
243	50
391	52
393	146
396	51
396	55
397	54
397	56
397	142
397	144
398	49
398	53
398	143
398	147
399	40
399	48
399	57
399	58
399	59
400	11
400	45
400	47
400	88
400	140
400	145
400	148
400	170
400	197
401	44
401	46
401	61
401	84
401	101
401	124
401	138
401	141
401	149
402	42
402	43
402	60
402	62
403	28
403	50
403	81
403	128
403	137
403	139
403	152
403	166
403	193
404	13
404	39
404	85
404	123
404	150
404	151
404	198
405	12
405	23
405	37
405	41
405	71
405	82
405	99
405	120
405	125
405	135
405	136
406	10
406	27
406	38
406	78
406	83
406	86
406	87
406	98
406	122
406	126
406	127
406	171
407	1
407	9
407	30
407	63
407	90
407	118
407	121
407	131
407	132
407	133
407	153
407	168
407	194
407	200
408	7
408	14
408	21
408	29
408	34
408	36
408	64
408	65
408	80
408	89
408	92
408	95
408	129
408	134
408	154
408	167
408	174
408	199
409	2
409	8
409	15
409	17
409	24
409	33
409	35
409	79
409	91
409	97
409	102
409	130
409	169
409	195
409	196
410	3
410	26
410	31
410	32
410	66
410	77
410	93
410	103
410	119
410	155
410	156
410	191
411	20
411	94
411	100
411	164
411	190
411	192
412	4
412	5
412	16
412	22
412	67
412	68
412	96
412	161
412	178
413	6
413	19
413	163
413	165
414	25
414	69
414	73
414	75
414	117
415	70
415	72
415	76
416	107
416	173
417	159
417	160
417	175
417	176
417	177
418	18
418	105
418	158
419	74
419	106
420	157
420	172
421	162
422	114
423	104
423	179
423	180
432	108
432	183
438	109
439	110
440	111
440	113
441	184
442	112
443	186
445	188
446	115
446	187
447	185
448	189
451	116
452	114
454	181
455	182
500	117
535	120
537	118
539	121
542	119
542	122
544	116
544	168
545	123
545	124
547	115
548	113
548	125
549	114
549	126
549	146
549	170
549	171
550	117
550	127
552	112
552	128
552	169
553	23
553	81
553	88
553	101
554	166
554	167
554	198
556	110
556	173
556	174
557	84
557	111
557	130
558	129
558	141
558	142
558	144
558	172
559	102
559	137
559	175
559	178
560	87
560	143
560	147
560	165
560	176
560	177
561	79
561	131
561	133
561	138
561	140
561	145
561	149
561	163
561	164
561	179
562	82
562	85
562	86
562	100
562	107
562	108
562	194
563	55
563	83
563	132
564	77
564	78
564	80
564	97
564	103
564	134
564	135
564	180
565	52
565	104
565	105
565	106
565	109
565	136
565	148
566	90
566	139
566	161
567	20
567	89
567	99
567	160
568	94
568	183
569	95
569	98
569	151
569	162
570	17
570	93
570	96
570	156
570	159
570	197
571	27
571	51
571	75
571	92
571	192
571	193
573	1
573	30
573	54
573	76
573	91
573	152
573	200
574	155
574	158
574	190
574	195
575	71
575	191
575	196
576	150
576	157
577	53
577	73
577	186
578	19
578	154
579	13
579	57
579	70
579	153
579	184
579	199
580	2
580	74
580	188
581	3
581	26
581	66
581	146
581	189
582	31
582	72
582	185
582	198
583	187
584	16
584	69
585	28
585	29
586	40
587	15
587	33
588	4
588	32
588	68
589	34
593	35
595	5
595	65
596	67
598	36
598	38
599	61
601	64
604	6
604	60
605	59
606	7
606	45
606	62
608	8
608	39
609	58
610	42
610	63
611	37
611	56
612	41
613	11
614	9
614	10
615	43
615	44
616	12
616	55
618	14
619	40
622	46
623	57
627	13
630	47
635	17
637	21
638	50
639	15
640	48
641	18
641	52
642	22
642	49
642	53
643	24
643	54
644	20
644	25
644	51
646	16
646	23
647	19
649	45
652	26
652	27
657	55
659	30
662	28
665	29
668	31
672	32
674	34
675	33
679	35
681	36
685	38
695	42
705	46
711	40
712	44
713	43
714	39
714	41
715	88
716	47
717	37
717	170
718	45
720	42
720	84
721	90
722	81
722	101
722	144
722	166
722	171
724	82
724	168
724	193
725	85
725	86
725	87
726	169
726	174
727	80
728	38
728	83
728	89
728	91
728	92
728	143
728	167
728	173
729	93
730	61
730	78
730	79
730	146
730	147
730	163
730	164
730	172
730	194
731	140
731	165
731	175
731	196
732	71
732	142
732	178
733	77
733	141
733	148
733	176
733	192
734	76
734	95
735	59
735	99
735	124
735	145
735	161
735	177
736	52
736	66
736	75
736	94
736	97
736	138
737	60
737	73
737	98
737	151
737	160
737	198
738	96
738	100
738	149
738	200
739	1
739	74
739	120
739	137
739	179
739	180
739	197
740	72
740	125
741	70
741	139
741	156
741	190
742	55
742	64
742	69
742	128
742	159
743	57
743	68
743	135
743	158
743	162
744	3
744	56
744	122
744	123
744	152
744	195
744	199
745	2
745	58
745	62
745	65
745	67
745	136
745	150
745	155
745	183
746	134
747	4
747	53
747	54
747	121
747	132
747	157
748	126
748	191
749	51
749	63
749	129
749	154
750	118
750	127
750	130
750	133
750	153
751	119
753	131
754	5
759	102
762	7
763	6
763	105
765	103
767	106
770	8
770	107
771	104
776	10
777	9
779	108
781	11
782	13
785	12
789	14
790	15
790	17
795	16
798	20
830	186
833	184
834	187
836	185
836	188
837	30
837	189
839	182
839	190
841	34
841	181
843	180
843	192
844	33
844	183
845	31
845	178
845	191
845	193
846	27
846	32
846	179
847	35
848	28
848	29
848	176
848	196
850	36
851	23
852	18
852	26
852	124
852	171
852	177
852	195
853	40
853	175
855	19
855	61
855	174
856	21
856	25
856	38
856	120
857	24
857	39
858	22
858	198
859	4
859	20
859	173
860	170
861	125
861	172
862	42
862	200
863	17
863	123
863	168
864	37
864	60
864	169
864	199
865	1
865	59
866	3
866	41
866	121
866	122
866	128
866	194
867	100
867	127
867	197
868	2
869	119
869	129
870	117
870	118
870	166
871	43
871	126
871	165
872	55
873	5
873	7
873	57
873	62
875	58
875	116
875	167
876	45
876	115
877	44
877	81
877	130
877	164
878	6
878	113
878	114
879	8
880	53
881	56
882	52
882	84
883	54
883	112
883	163
884	46
884	101
884	110
884	111
884	144
884	161
886	82
886	140
887	48
887	51
887	88
887	146
890	109
890	143
891	47
891	49
891	50
892	80
892	85
892	86
892	99
892	124
892	137
892	141
892	149
893	40
893	108
893	138
893	145
893	147
894	142
895	83
896	78
896	79
896	87
896	107
898	90
898	151
899	135
900	133
900	148
901	77
901	97
901	103
901	131
901	134
901	139
902	132
902	136
904	66
904	95
905	93
905	94
906	96
907	61
907	89
907	92
907	106
907	150
908	63
908	91
908	98
908	102
908	104
909	152
909	159
910	105
911	64
911	100
912	65
912	156
913	160
915	67
915	155
918	162
919	68
919	69
921	70
922	71
922	153
923	157
924	73
924	158
925	76
925	154
925	161
926	72
926	75
930	62
930	74
932	99
951	128
954	130
960	129
962	125
963	127
964	126
967	123
967	124
968	120
969	55
970	122
971	59
972	121
977	57
977	60
978	58
978	118
978	119
981	56
982	61
984	84
984	168
986	54
988	53
988	62
989	52
989	81
990	165
991	171
992	88
992	170
994	51
994	164
995	39
997	166
998	55
998	85
998	167
999	42
999	87
999	169
1000	13
1000	86
1000	163
1001	38
1001	82
1002	35
1002	146
1004	144
1005	11
1005	83
1005	160
1006	9
1006	78
1008	23
1008	36
1008	40
1008	79
1008	80
1009	17
1009	33
1009	34
1009	90
1009	161
1010	37
1010	84
1011	43
1011	77
1011	162
1012	12
1012	15
1012	41
1013	156
1014	10
1014	32
1014	44
1014	159
1015	7
1015	14
1015	20
1016	16
1016	30
1016	31
1017	8
1018	45
1018	158
1019	29
1019	75
1021	19
1022	27
1022	140
1022	155
1024	5
1024	46
1025	26
1025	28
1025	157
1026	76
1027	22
1028	4
1030	1
1030	151
1032	3
1032	24
1032	25
1033	6
1033	21
1033	200
1036	147
1036	149
1037	152
1037	198
1038	2
1038	143
1039	199
1040	23
1040	196
1041	150
1043	153
1043	154
1044	148
1045	145
1045	193
1046	141
1046	197
1050	195
1051	144
1051	192
1052	142
1052	194
1053	146
1055	138
1057	124
1057	191
1058	190
1059	140
1060	40
1060	137
1061	135
1062	134
1063	139
1063	189
1064	132
1064	136
1065	128
1065	133
1065	188
1067	131
1067	186
1068	125
1069	42
1069	130
1069	187
1070	129
1071	66
1071	185
1072	127
1072	184
1074	126
1075	123
1078	180
1078	183
1079	122
1080	63
1080	65
1080	176
1085	64
1085	67
1085	120
1086	94
1086	179
1087	68
1087	182
1088	121
1088	175
1089	61
1089	69
1089	70
1089	174
1089	178
1090	177
1091	59
1091	73
1091	93
1091	95
1091	119
1091	124
1092	97
1092	118
1093	71
1093	72
1093	173
1093	181
1094	62
1094	171
1095	92
1095	96
1095	117
1095	172
1096	60
1098	74
1098	168
1099	55
1100	91
1100	116
1101	114
1101	115
1102	81
1103	57
1103	88
1103	113
1103	170
1104	58
1104	76
1104	89
1104	90
1104	169
1106	101
1108	77
1108	111
1109	75
1109	87
1109	112
1111	56
1111	79
1111	84
1111	99
1111	100
1112	53
1112	78
1112	86
1112	98
1112	105
1113	52
1113	85
1113	110
1114	54
1115	102
1116	83
1117	82
1117	103
1118	109
1119	106
1119	108
1120	51
1120	80
1120	97
1120	104
1120	107
1121	156
1125	66
1127	13
1127	48
1134	17
1134	49
1136	47
1138	20
1139	45
1139	50
1141	44
1142	165
1144	46
1146	166
1148	43
1150	167
1151	41
1151	42
1151	164
1152	161
1154	39
1154	163
1156	38
1156	160
1157	40
1159	159
1160	162
1161	37
1161	158
1163	155
1164	157
1165	35
1165	36
1167	34
1169	33
1169	156
1172	32
1172	154
1175	30
1175	31
1175	152
1176	151
1178	29
1180	153
1181	27
1182	147
1183	28
1183	149
1184	150
1187	26
1187	144
1188	146
1188	193
1190	143
1191	23
1191	148
1193	24
1194	55
1195	22
1195	145
1196	25
1197	140
1197	142
1199	21
1199	124
1199	141
1200	19
1203	123
1203	125
1203	138
1204	120
1204	137
1205	128
1206	15
1206	139
1207	18
1207	20
1207	122
1208	16
1208	127
1208	135
1209	121
1209	134
1210	17
1210	118
1210	126
1210	168
1211	119
1211	129
1211	136
1212	61
1213	130
1213	132
1213	133
1214	71
1216	14
1216	131
1217	13
1218	59
1219	11
1219	171
1220	12
1222	10
1224	57
1224	170
1225	9
1226	169
1227	8
1229	7
1230	174
1231	173
1232	165
1234	5
1234	60
1235	4
1236	175
1236	176
1236	178
1238	6
1238	58
1238	172
1238	177
1240	1
1240	3
1241	56
1241	62
1241	73
1243	52
1243	179
1243	180
1244	55
1244	198
1244	200
1245	2
1245	54
1245	75
1245	81
1246	53
1246	70
1247	51
1247	93
1247	197
1248	199
1249	196
1250	59
1250	72
1251	63
1251	74
1251	183
1251	194
1253	69
1253	184
1254	65
1254	68
1254	192
1255	64
1255	76
1255	94
1255	195
1256	166
1257	57
1257	61
1257	66
1257	77
1257	190
1258	67
1258	71
1258	191
1259	78
1259	84
1259	186
1260	79
1260	161
1261	95
1261	187
1262	97
1262	185
1263	82
1263	96
1263	188
1264	189
1266	80
1266	85
1266	87
1266	193
1267	83
1267	92
1268	182
1271	88
1271	90
1271	100
1272	86
1274	91
1275	181
1276	89
1277	99
1278	93
1278	98
1333	167
1335	171
1337	164
1338	163
1338	168
1339	170
1341	165
1342	160
1342	166
1342	169
1343	162
1344	159
1345	146
1345	156
1345	161
1346	158
1347	155
1348	40
1348	157
1349	42
1349	75
1350	124
1350	144
1350	173
1351	172
1352	13
1352	142
1352	147
1352	154
1353	38
1353	140
1353	141
1353	151
1354	143
1354	152
1354	174
1355	149
1356	138
1356	145
1356	153
1357	37
1357	105
1357	175
1358	15
1358	148
1358	150
1358	176
1358	177
1359	178
1360	30
1360	43
1360	137
1361	41
1361	73
1361	179
1361	180
1362	33
1362	34
1362	45
1362	139
1363	27
1363	36
1363	39
1363	44
1363	101
1363	103
1364	102
1364	135
1365	17
1365	32
1365	35
1365	106
1365	107
1365	136
1365	183
1366	29
1366	31
1366	134
1367	20
1367	97
1367	104
1368	28
1368	46
1368	132
1368	133
1370	26
1370	48
1370	109
1370	171
1370	184
1371	23
1371	47
1371	100
1371	111
1371	120
1371	130
1372	71
1372	99
1372	108
1373	131
1374	95
1374	125
1374	129
1375	128
1375	185
1376	16
1376	19
1376	21
1376	70
1376	96
1376	98
1376	123
1377	25
1377	94
1377	110
1377	114
1378	22
1378	52
1378	112
1378	122
1378	127
1379	24
1379	113
1379	118
1379	121
1379	126
1380	55
1381	18
1381	93
1382	40
1382	92
1382	117
1382	181
1383	51
1383	119
1384	115
1384	124
1385	90
1386	81
1386	186
1387	116
1388	49
1389	53
1389	88
1389	182
1390	89
1391	54
1393	79
1394	91
1395	42
1395	84
1398	57
1398	76
1399	77
1399	78
1400	83
1401	72
1401	82
1401	87
1402	85
1403	61
1403	80
1403	86
1403	170
1404	50
1404	60
1404	74
1407	69
1408	56
1408	58
1408	73
1409	59
1409	75
1410	168
1411	62
1413	71
1415	68
1416	55
1418	52
1419	66
1420	65
1420	70
1422	64
1422	67
1423	146
1424	63
1528	144
1528	187
1529	81
1531	142
1532	184
1533	95
1533	147
1533	190
1534	180
1534	186
1534	188
1535	138
1535	140
1535	143
1535	145
1535	185
1535	193
1536	40
1536	72
1536	141
1536	146
1536	183
1536	191
1536	192
1537	84
1537	97
1537	148
1537	149
1537	189
1537	196
1537	197
1538	30
1538	51
1538	94
1538	137
1538	139
1538	171
1538	179
1539	1
1539	195
1539	198
1540	28
1540	53
1540	54
1540	92
1540	93
1540	98
1540	176
1540	182
1540	200
1541	2
1541	3
1541	31
1541	55
1541	69
1541	88
1541	96
1541	99
1541	101
1541	124
1541	135
1541	136
1541	194
1541	199
1542	27
1542	90
1542	161
1543	34
1543	45
1543	85
1543	91
1543	100
1543	105
1543	133
1543	175
1543	178
1544	4
1544	33
1544	38
1544	43
1544	48
1544	83
1544	132
1544	134
1544	152
1544	169
1544	174
1545	20
1545	32
1545	39
1545	44
1545	52
1545	73
1545	76
1545	78
1545	128
1545	151
1545	170
1545	177
1546	29
1546	35
1546	42
1546	130
1546	150
1546	166
1546	173
1547	41
1547	46
1547	57
1547	71
1547	82
1547	89
1547	131
1548	5
1548	36
1548	47
1548	49
1548	66
1548	79
1548	86
1548	102
1548	125
1549	23
1549	70
1549	87
1549	103
1549	120
1549	123
1549	129
1549	181
1550	6
1550	37
1550	56
1550	77
1550	156
1550	167
1550	172
1551	7
1551	26
1551	80
1551	122
1551	126
1551	127
1551	165
1552	68
1552	74
1552	75
1552	104
1552	106
1552	155
1552	168
1553	17
1553	24
1553	107
1553	164
1554	8
1554	121
1554	163
1555	61
1556	13
1556	50
1556	118
1557	67
1557	159
1558	22
1558	59
1558	160
1559	25
1559	119
1559	158
1560	9
1560	60
1560	65
1561	64
1562	10
1562	11
1562	21
1562	108
1562	162
1563	58
1564	62
1565	19
1565	157
1566	12
1567	15
1567	63
1569	14
1569	154
1570	16
1570	153
1574	18
1579	20
1582	17
1590	81
1595	72
1599	84
1633	110
1635	109
1636	111
1637	114
1638	113
1639	112
1640	117
1642	108
1642	115
1645	116
1648	107
1649	57
1650	106
1653	120
1654	105
1656	103
1656	104
1656	118
1659	101
1660	102
1661	119
1662	100
1662	121
1664	55
1664	122
1664	168
1666	99
1667	97
1667	98
1667	123
1667	124
1669	125
1670	95
1670	171
1671	23
1671	94
1672	96
1672	170
1673	93
1673	126
1675	127
1675	161
1676	92
1678	128
1678	169
1679	90
1680	89
1680	167
1681	88
1681	165
1682	91
1683	166
1684	163
1684	164
1685	87
1685	173
1686	86
1688	83
1688	160
1688	162
1689	75
1689	84
1689	85
1690	156
1691	71
1691	158
1691	159
1692	61
1693	22
1693	79
1693	82
1694	172
1694	178
1695	78
1695	155
1695	174
1696	52
1696	76
1696	80
1696	81
1696	157
1696	175
1697	13
1697	73
1697	176
1697	177
1698	59
1698	69
1698	77
1699	74
1700	60
1700	70
1701	20
1701	152
1701	179
1702	53
1702	54
1702	72
1702	154
1703	17
1703	58
1703	68
1703	151
1703	180
1704	15
1704	51
1704	56
1704	66
1705	19
1705	26
1705	144
1706	55
1706	149
1706	171
1707	57
1707	62
1707	64
1707	65
1707	153
1708	146
1708	150
1708	168
1709	16
1709	21
1709	67
1709	147
1711	18
1712	63
1713	24
1714	23
1714	40
1715	25
1715	148
1716	61
1716	145
1717	27
1717	143
1718	140
1719	28
1719	142
1720	22
1724	30
1725	29
1725	137
1725	141
1726	31
1726	138
1727	33
1727	135
1728	32
1729	139
1730	34
1731	129
1732	35
1732	132
1732	134
1733	37
1733	133
1733	136
1735	39
1735	130
1735	131
1736	36
1736	38
1740	42
1740	128
1748	41
1748	144
1749	43
1749	193
1751	40
1752	44
1755	45
1758	124
1759	125
1761	46
1761	48
1762	127
[truncated: 35,175 more rows]
